# Supplementary material
Source: PubMed Central journal article supplement (PMC521119)

# MALDI-TOF of Oligonucleotides using Internal Standards

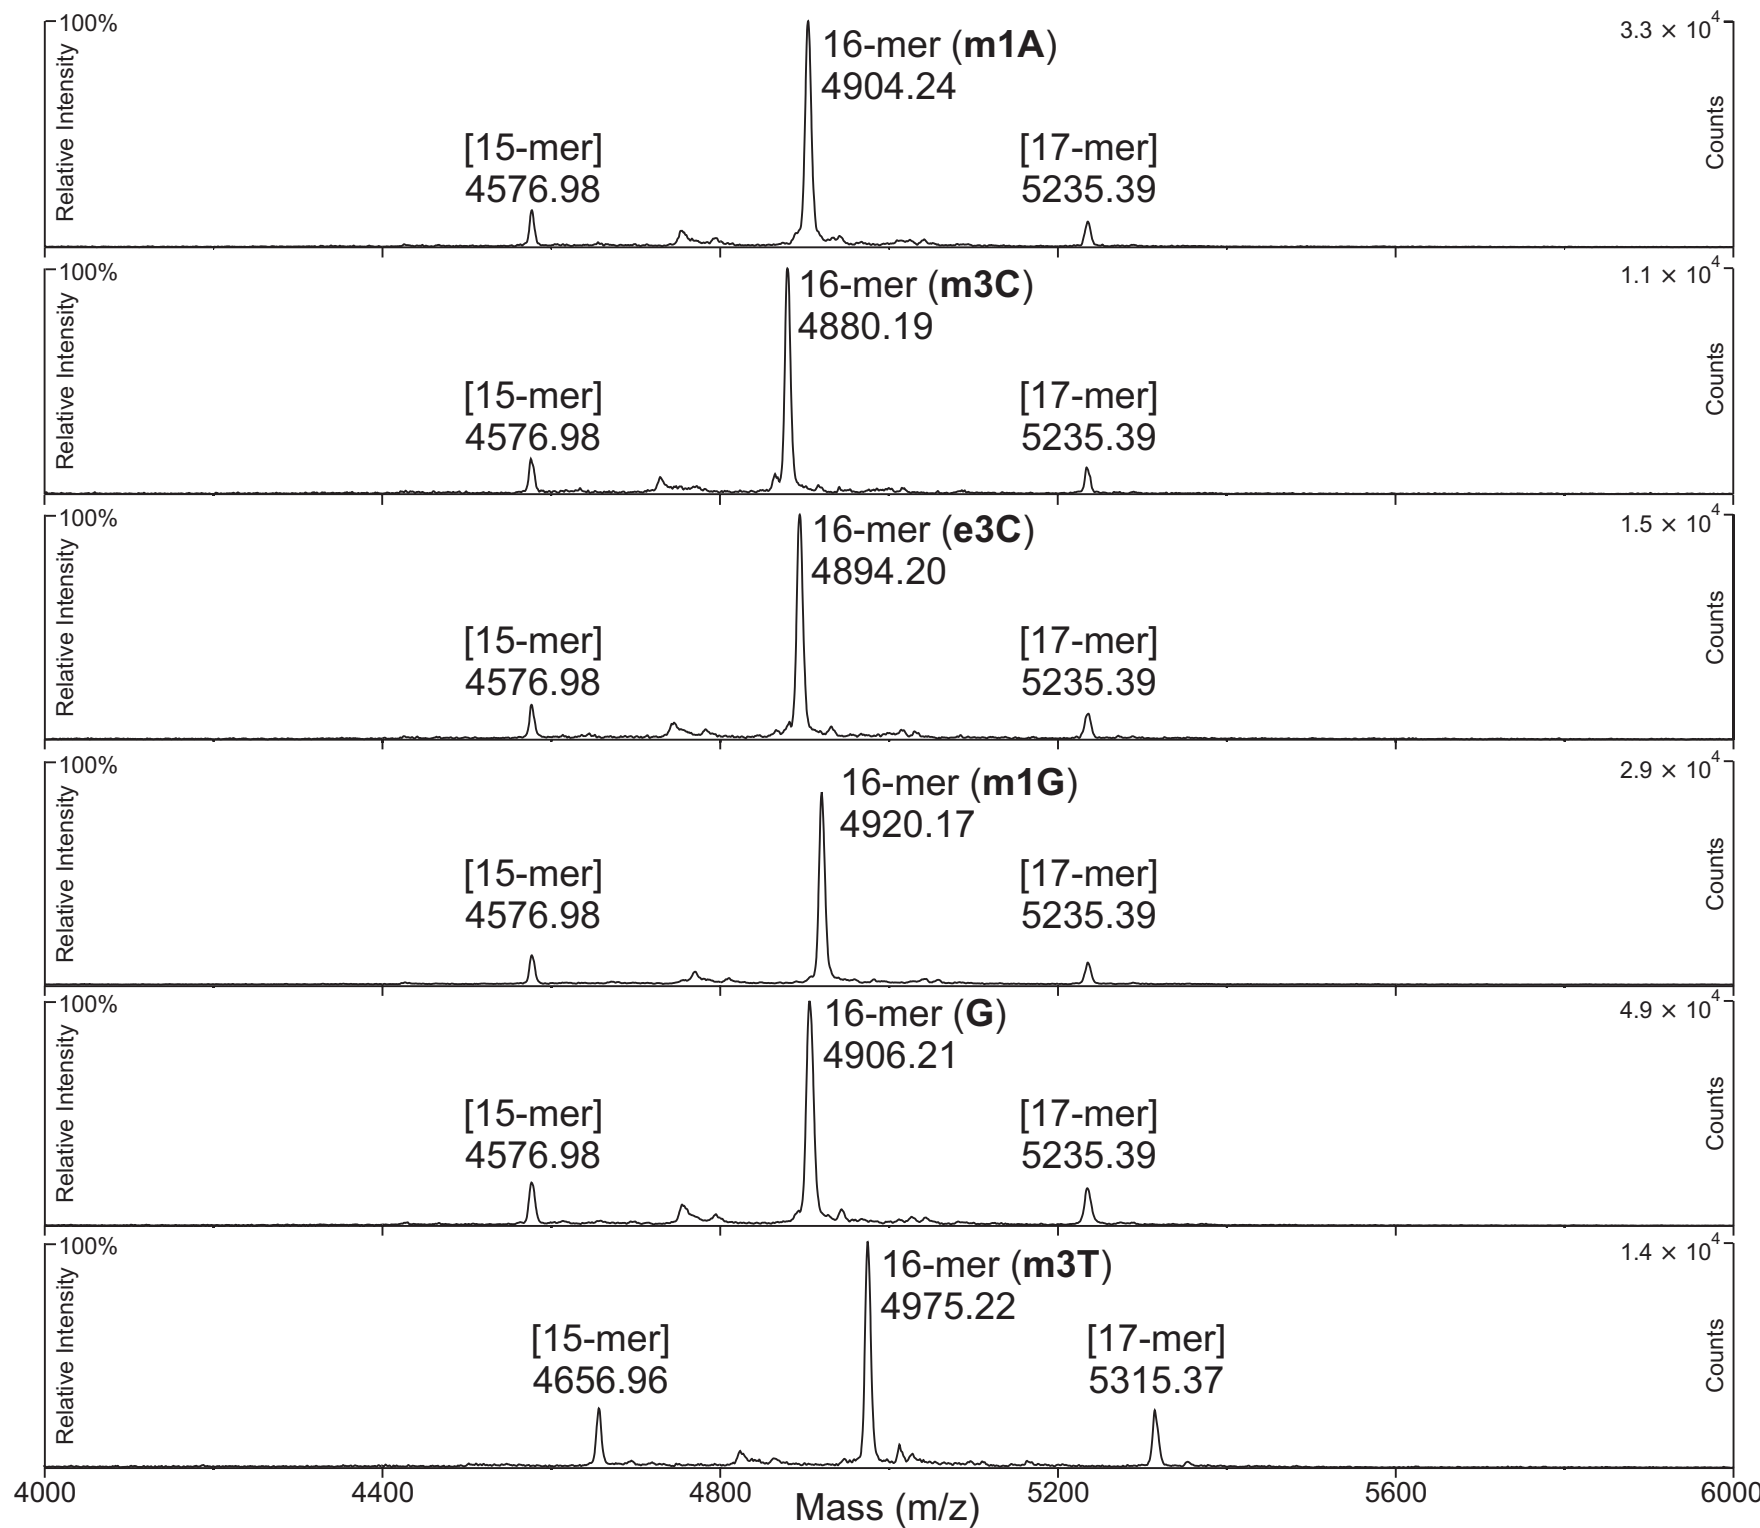

Supplement: pnas_101_39_14051__1.pdf [file pnas_101_39_14051__1.pdf]

# Acid Hydrolysate of Oligonucleotides

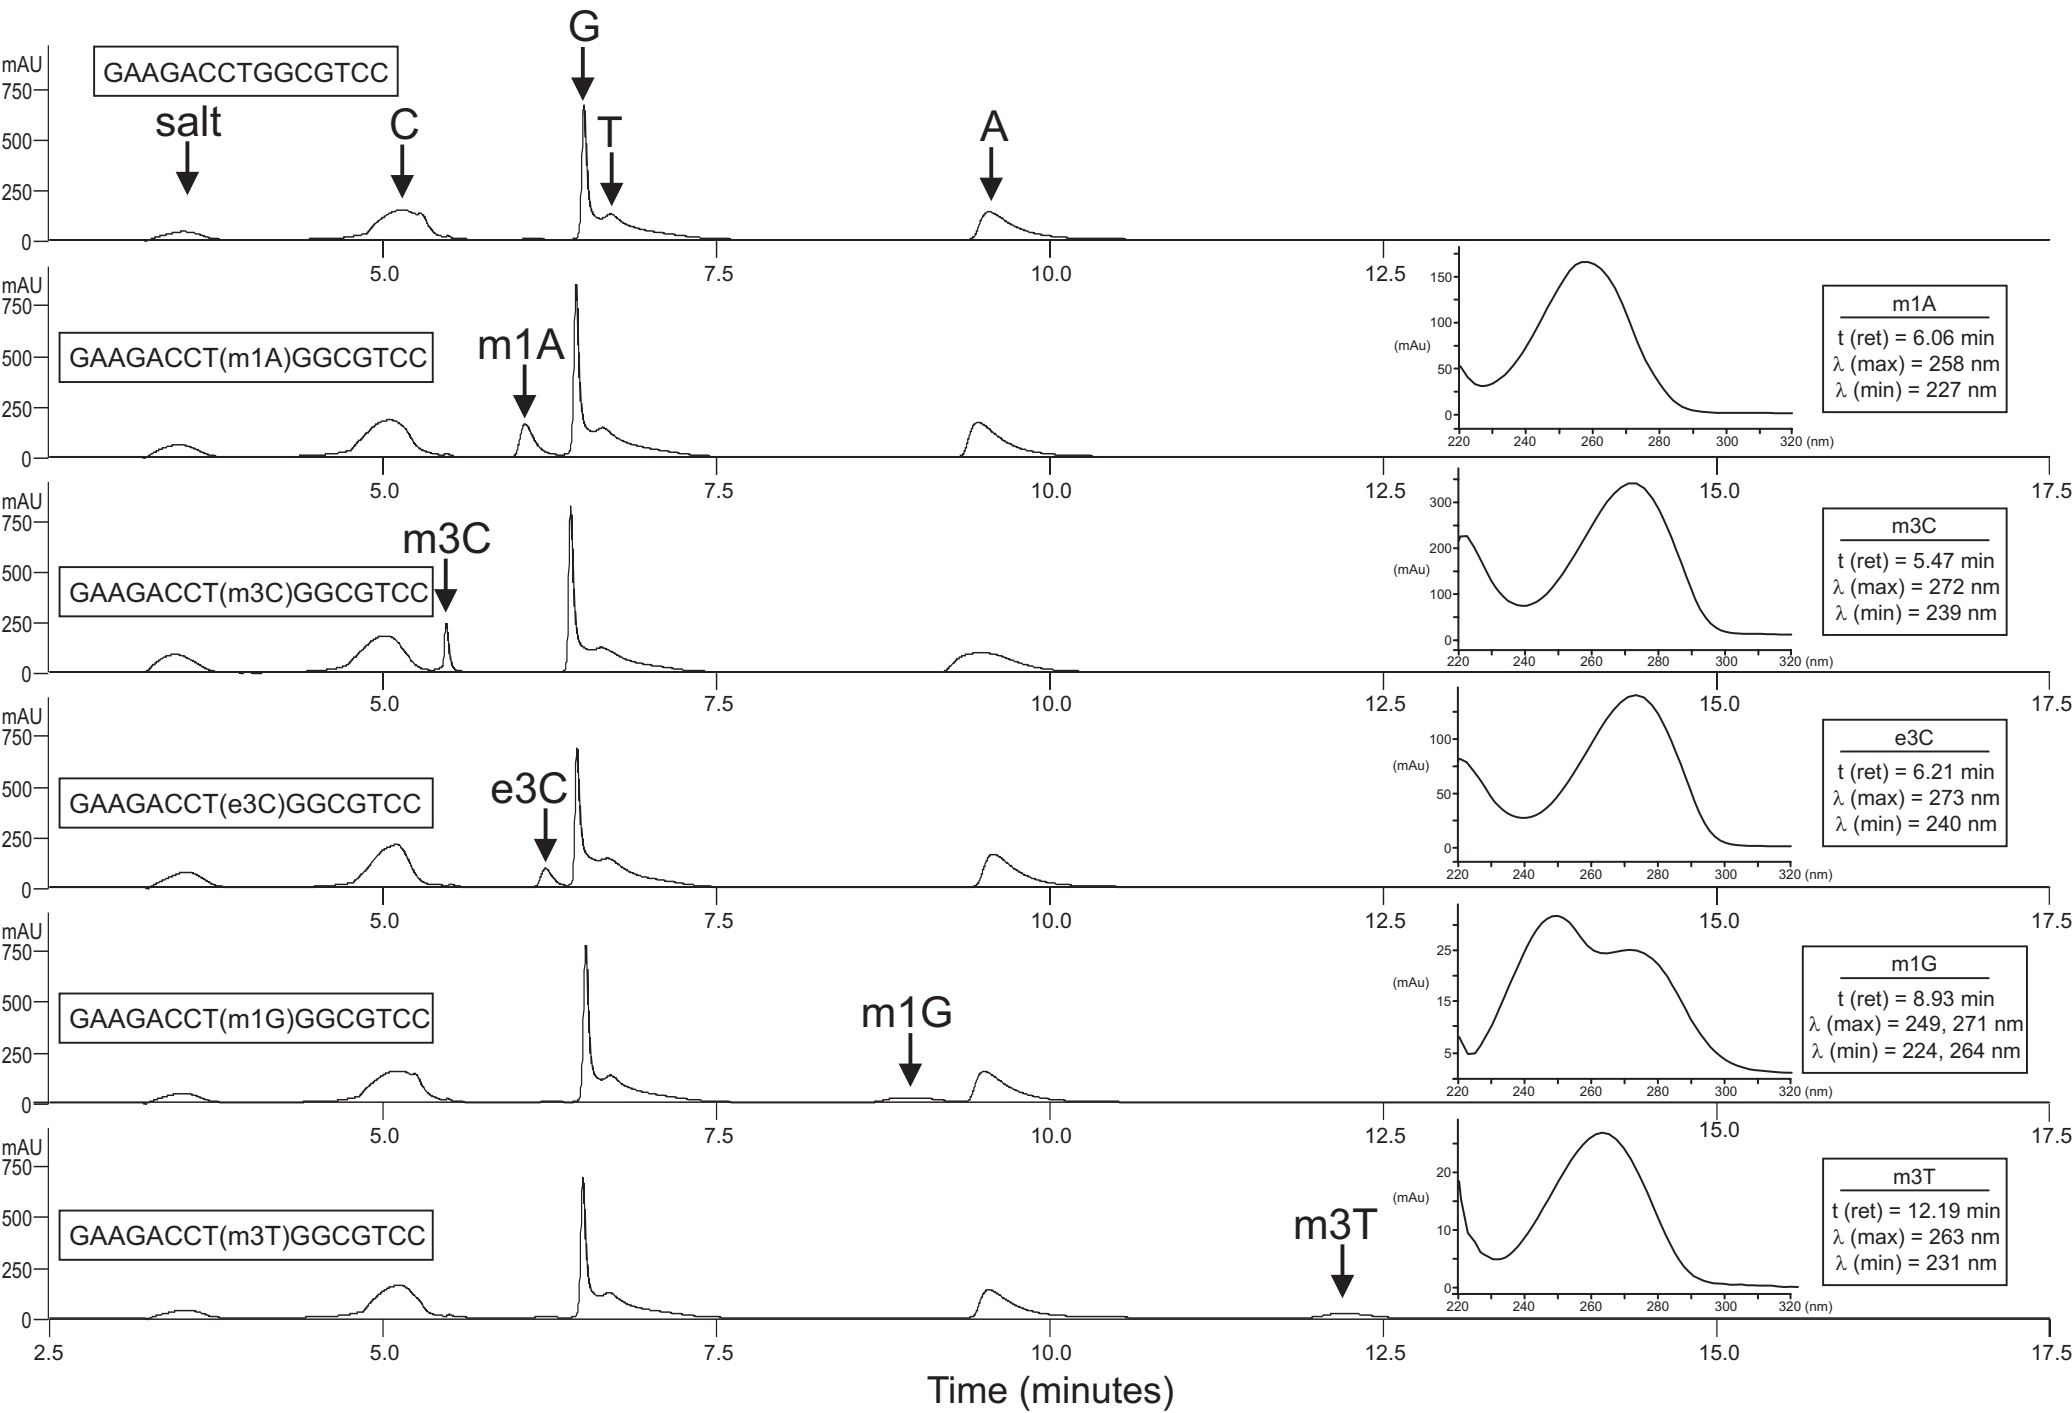

Supplement: pnas_101_39_14051__2.pdf [file pnas_101_39_14051__2.pdf]

# Co-injection of Recovered Acid-Hydrolyzed Modified Base with Standards

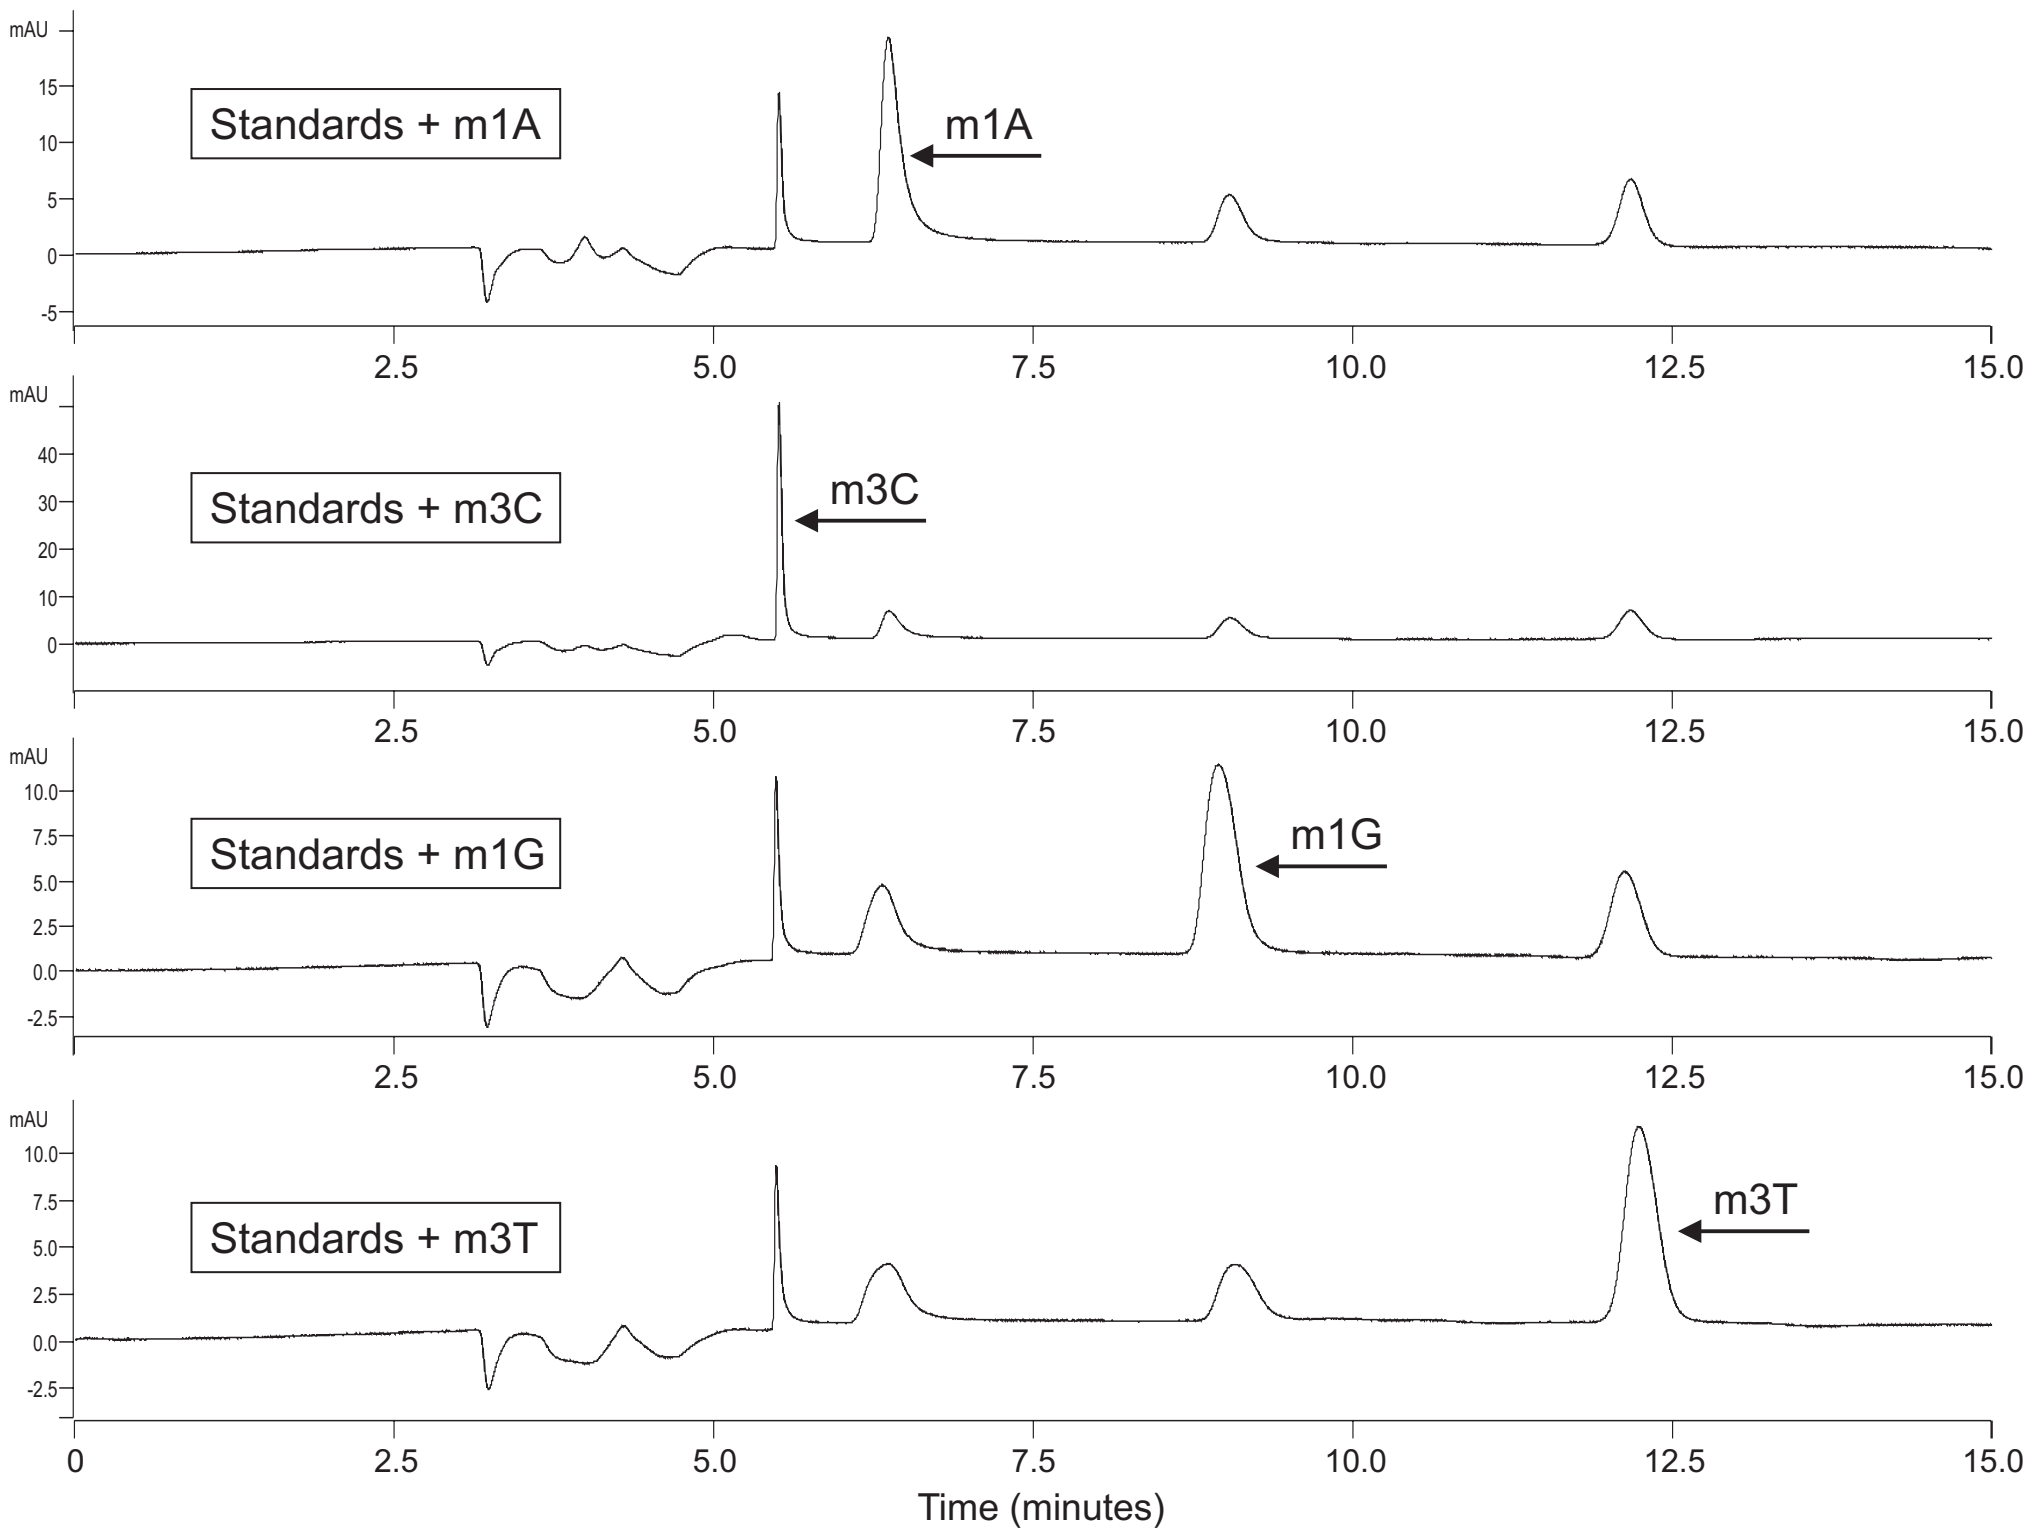

Supplement: pnas_101_39_14051__3.pdf [file pnas_101_39_14051__3.pdf]

# Genome Concentration and Ligation Efficiency

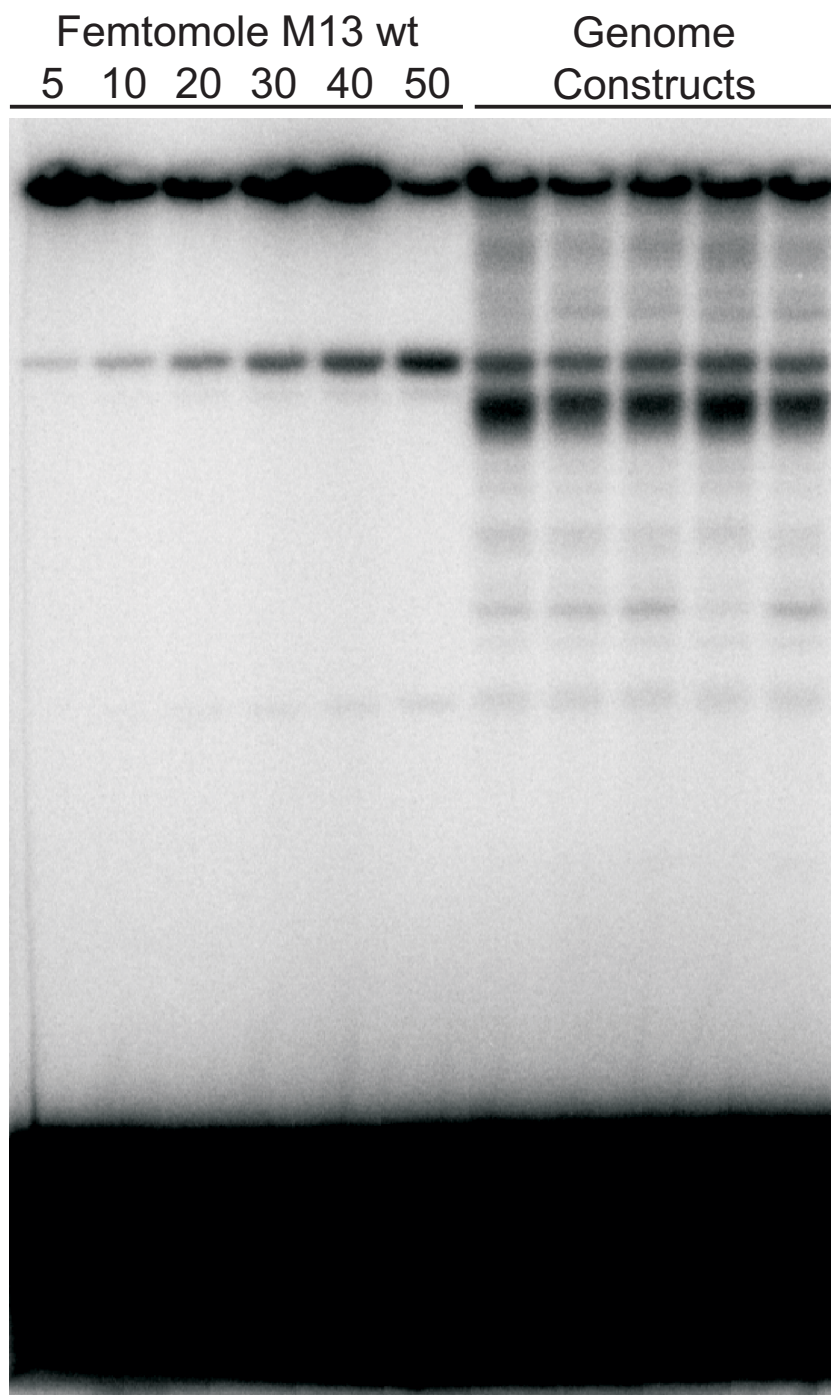

Supplement: pnas_101_39_14051__4.pdf [file pnas_101_39_14051__4.pdf]
